# Supplementary material for: Integrating molecular design and crystal engineering approaches in non-humidified intermediate-temperature proton conductors based on a Dawson-type polyoxometalate and poly(ethylene glycol) derivatives
Source: Royal Society of Chemistry journal article supplement (doi:10.1039/d1nr01220g), 2021-01-01
Supplement: d1nr01220g1.pdf [file d1nr01220g1.pdf]

Supporting Information for

**Integrating molecular design and crystal engineering  
approaches in non-humidified intermediate-temperature  
proton conductors based on a Dawson-type polyoxometalate  
and poly(ethylene glycol) derivatives**

Naoki Ogiwara,<sup>a</sup> Masahiro Tomoda,<sup>a</sup> Shotaro Miyazaki,<sup>a</sup> Zhewei Weng,<sup>a</sup> Hiroshi Takatsu,<sup>b</sup> Hiroshi Kageyama,<sup>b</sup> Toshiyuki Misawa,<sup>c</sup> Takeru Ito,<sup>c</sup> and Sayaka Uchida\*<sup>a</sup>

<sup>a</sup> Department of Basic Science, School of Arts and Sciences, The University of Tokyo, Komaba, Meguro-ku, Tokyo 153-8902, Japan

<sup>b</sup> Department of Energy and Hydrocarbon Chemistry, Graduate School of Engineering, Kyoto University, Nishikyo-ku, Kyoto 615-8510, Japan

<sup>c</sup> Department of Chemistry, School of Science, Tokai University, 4-1-1 Kitakaname, Hiratsuka 259-1292, Japan

## Table of contents

| Title                                                                                                           | Pages        |
|-----------------------------------------------------------------------------------------------------------------|--------------|
| <b>Experimental Section</b>                                                                                     | <b>S4–S6</b> |
| <b>Table S1.</b> Crystallographic data of <b>CsK-PEG400</b> , <b>Cs-PEG200</b> , and <b>Cs-PEG400</b> .         | <b>S7</b>    |
| <b>Fig. S1</b> IR spectra of <b>CsK-PEG400</b> , $K_6[\alpha-P_2W_{18}O_{62}]$ , and PEG400.                    | <b>S8</b>    |
| <b>Fig. S2</b> TGA curve of <b>CsK-PEG400</b> .                                                                 | <b>S8</b>    |
| <b>Fig. S3</b> PXRD patterns of <b>CsK-PEG400</b> .                                                             | <b>S9</b>    |
| <b>Fig. S4</b> PXRD patterns of <b>CsK-PEG400</b> before and after heating at 150 °C.                           | <b>S9</b>    |
| <b>Fig. S5</b> IR spectra of <b>CsK-PGME</b> , $K_6[\alpha-P_2W_{18}O_{62}]$ , and PGME.                        | <b>S10</b>   |
| <b>Fig. S6</b> TGA curve of <b>CsK-PGME</b> .                                                                   | <b>S10</b>   |
| <b>Fig. S7</b> PXRD patterns of <b>CsK-PGME</b> .                                                               | <b>S11</b>   |
| <b>Fig. S8</b> PXRD patterns of <b>CsK-PGME</b> before and after heating at 150 °C.                             | <b>S11</b>   |
| <b>Fig. S9</b> IR spectra of <b>CsK-PGDM</b> , $K_6[\alpha-P_2W_{18}O_{62}]$ , and PGDM.                        | <b>S12</b>   |
| <b>Fig. S10</b> TGA curve of <b>CsK-PGDM</b> .                                                                  | <b>S12</b>   |
| <b>Fig. S11</b> PXRD patterns of <b>CsK-PGDM</b> .                                                              | <b>S13</b>   |
| <b>Fig. S12</b> PXRD patterns of <b>CsK-PGDM</b> before and after heating at 150 °C.                            | <b>S13</b>   |
| <b>Fig. S13</b> Specific heat capacities ( $C_P$ ) of <b>CsK-PEG400</b> , <b>CsK-PGME</b> and <b>CsK-PGDM</b> . | <b>S14</b>   |
| <b>Fig. S14</b> $C_P T^{-1}$ of <b>CsK-PEG400</b> , <b>CsK-PGME</b> , and <b>CsK-PGDM</b> .                     | <b>S14</b>   |
| <b>Fig. S15</b> IR spectra of <b>CsK-PEG300</b> , $K_6[\alpha-P_2W_{18}O_{62}]$ , and PEG300.                   | <b>S15</b>   |
| <b>Fig. S16</b> TGA curve of <b>CsK-PEG300</b> .                                                                | <b>S15</b>   |

|                                                                                                |            |
|------------------------------------------------------------------------------------------------|------------|
| <b>Fig. S17</b> PXRD patterns of <b>CsK-PEG300</b> .                                           | <b>S16</b> |
| <b>Fig. S18</b> PXRD patterns of <b>CsK-PEG300</b> before and after heating at 150 °C.         | <b>S16</b> |
| <b>Fig. S19</b> IR spectra of <b>Cs-PEG200</b> , $K_6[\alpha-P_2W_{18}O_{62}]$ , and PEG200.   | <b>S17</b> |
| <b>Fig. S20</b> TGA curve of <b>Cs-PEG200</b> .                                                | <b>S17</b> |
| <b>Fig. S21</b> PXRD patterns of <b>Cs-PEG200</b> .                                            | <b>S18</b> |
| <b>Fig. S22</b> PXRD patterns of <b>Cs-PEG200</b> before and after heating at 150 °C.          | <b>S18</b> |
| <b>Fig. S23</b> IR spectra of <b>Cs-PEG400</b> , $H_6[\alpha-P_2W_{18}O_{62}]$ , and PEG400.   | <b>S19</b> |
| <b>Fig. S24</b> TGA curve of <b>Cs-PEG400</b> .                                                | <b>S19</b> |
| <b>Fig. S25</b> PXRD patterns of <b>Cs-PEG400</b> .                                            | <b>S20</b> |
| <b>Fig. S26</b> PXRD patterns of <b>Cs-PEG400</b> before and after heating at 150 °C.          | <b>S20</b> |
| <b>Fig. S27</b> Specific heat capacities ( $C_P$ ) of <b>CsK-PEG400</b> and <b>Cs-PEG400</b> . | <b>S21</b> |
| <b>Fig. S28</b> $C_P T^{-1}$ of <b>CsK-PEG400</b> and <b>Cs-PEG400</b> .                       | <b>S21</b> |
| <b>References</b>                                                                              | <b>S22</b> |

## Experimental Section

### Materials.

$K_6[\alpha-P_2W_{18}O_{62}] \cdot nH_2O$  and  $H_6[\alpha-P_2W_{18}O_{62}] \cdot nH_2O$  were synthesized according to previously reported methods.<sup>1</sup>  $CsNO_3$  and polyethylene glycols were purchased from Kanto Kagaku and used as received.

### Syntheses.

**CsK-PEG400** was synthesized as follows: 3.0 g of PEG400 (molecular weight = 400) and 0.20 g of  $CsNO_3$  were added to 5 mL of  $H_2O$  (solution A). 0.25 g of  $K_6[P_2W_{18}O_{62}] \cdot nH_2O$  was added to 5 mL of  $H_2O$  (solution B). Solution B was added to solution A dropwise and the mixed solution was stirred at 80 °C for 30 min. The solution was cooled overnight to room temperature, left at 5 °C for 1 day, and colorless crystals of **CsK-PEG400** were obtained. The synthetic methods were basically the same for **CsK-PGME** (PGME was used instead of PEG400), **CsK-PGDE** (PGDE was used instead of PEG400), **CsK-PEG300** (PEG300 was used instead of PEG400), **Cs-PEG200** (PEG200 was used instead of PEG400) and **Cs-PEG400** ( $H_6[\alpha-P_2W_{18}O_{62}] \cdot nH_2O$  was used instead of  $K_6[\alpha-P_2W_{18}O_{62}] \cdot nH_2O$ , and 0.35 g of  $CsNO_3$  was used instead of 0.20 g of  $CsNO_3$ ). Anal. Found (calcd) of  $Cs_{3.5}K_{1.3}H_{1.2}[\alpha-P_2W_{18}O_{62}] \cdot 4.2PEG400 \cdot 3.6H_2O$  (**CsK-PEG400**): H, 1.7 (2.4); C, 13 (13); P, 0.96 (0.94); K, 0.77 (0.77); Cs, 7.1 (7.1); W, 49 (50). Anal. Found (calcd) of  $Cs_{3.3}K_{1.5}H_{1.2}[\alpha-P_2W_{18}O_{62}] \cdot 4.3PGME400 \cdot 2.2H_2O$  (**CsK-PGME**): H, 1.5 (2.5); C, 14 (13); P, 0.99 (0.93); K, 0.88 (0.88); Cs, 6.6 (6.6); W, 50 (50). Anal. Found (calcd) of  $Cs_{3.1}K_{1.6}H_{1.3}[\alpha-P_2W_{18}O_{62}] \cdot 3.6PGDE500 \cdot 3.9H_2O$  (**CsK-PGDE**): H, 1.6 (2.6); C, 14 (13); P, 1.0 (0.93); K, 0.93 (0.93); Cs, 6.2 (6.2); W, 48 (49). Anal. Found (calcd) of  $Cs_{3.5}K_{1.5}H_{1.0}[\alpha-P_2W_{18}O_{62}] \cdot 5.5PEG400 \cdot 3.9H_2O$  (**CsK-PEG300**): H, 1.9 (2.4); C, 13 (13); P, 0.93 (0.93); K, 0.87 (0.87); Cs, 7.1 (7.1); W, 45 (50). Anal. Found (calcd) of  $Cs_{5.0}H_{1.0}[\alpha-P_2W_{18}O_{62}] \cdot 4.3PEG200 \cdot 1.2H_2O$  (**Cs-PEG200**): H, 0.45 (1.4); C, 7.2 (7.2); P, 1.1 (1.1); Cs, 11 (11); W, 53 (56). Anal. Found (calcd) of  $Cs_{5.0}H_{1.0}[\alpha-P_2W_{18}O_{62}] \cdot 4.1PEG400 \cdot 6.6H_2O$  (**Cs-PEG400**): H, 1.9 (2.4); C, 12 (12); P, 0.98 (0.92); Cs, 9.7 (9.7); W, 47 (49).

### Single-crystal X-ray diffraction analysis.

X-ray diffraction data for **CsK-PEG400** were collected with a combination of rayonix-MX225-HS CCD area detector and a synchrotron radiation ( $\lambda = 0.61000$  Å) at 2D beamline in Pohang Accelerator Laboratory (PAL). The processing of diffraction images and absorption correction were both performed with HKL3000.<sup>2</sup> X-ray diffraction data for **Cs-PEG200** were collected with a HyPix-6000 X-ray photon counting detector (Rigaku Oxford diffraction) and graphite-monochromated Mo  $K\alpha$  radiation ( $\lambda = 0.71073$  Å). X-ray diffraction data for **Cs-PEG400** were collected with a CCD 2-D detector using a Rigaku Saturn diffractometer and graphite monochromated Mo  $K\alpha$  radiation ( $\lambda = 0.71073$  Å). The structures were solved by dual-space algorithm using SHELXT (ver. 2018/2) and refined by the full-matrix least-squares method on  $F^2$  using SHELXL (ver. 2018/3). The calculations were performed using the CrystalStructure<sup>3</sup> (**CsK-PEG400**) or CrysAlisPro<sup>4</sup> (**Cs-PEG400** and **Cs-PEG200**) package. The deposited numbers of Cambridge Crystallographic Data Centre (CCDC) are CCDC-2047152 for **CsK-PEG400**, CSD-2052968 for **Cs-PEG200**, and CSD-2052969 for **Cs-PEG400**. Void analysis was carried out by Mercury structure visualization software (CCDC) with a probe radius of 2.0 Å and approximate grid space of 0.7 Å.

### Measurements.

Combustion analysis (Elementar, vario MICRO cube) was used for the quantitative analysis of C and H. Inductively coupled plasma optical emission spectrometry (ICP-OES) (Agilent Technologies, ICP-OES720) was used for the quantitative analysis of P and W. AAS analysis (Hitachi, ZA3000) was used for the quantitative analysis of K and Cs. Thermogravimetry-differential thermal analysis (TG-DTA) data were measured with a Thermo Plus 2 thermogravimetric analyzer (Rigaku Corporation) with  $\alpha$ -Al<sub>2</sub>O<sub>3</sub> as a reference under a dry N<sub>2</sub> and O<sub>2</sub> flow (80 and 20 mL min<sup>-1</sup>, respectively) in the temperature range of 303–773 K at an increasing rate of 10 K min<sup>-1</sup>. Powder X-ray diffraction (PXRD) patterns were measured with a New advance D8 X-ray diffractometer (Bruker) by using Cu  $K\alpha$  radiation ( $\lambda = 1.54056$  Å, 40 kV–40 mA) at  $2\theta = 3$ – $40^\circ$  and  $1.8^\circ$  min<sup>-1</sup>. Solid-state magic angle

spinning (MAS) NMR spectra (MAS rate 10 kHz) were recorded with an AVANCE 400WB spectrometer (Bruker), and the resonance frequency for  $^{13}\text{C}$  was 100.6 MHz. Adamantane ( $^{13}\text{C}$ , 28.5 and 38. ppm) was used as an external standard for the calibration of chemical shifts. Cross-polarization (CP) was used for the NMR measurements. Alternating current (AC) impedance measurements: about 0.1 g of the compounds was compressed at  $40 \text{ kgf cm}^{-2}$  into pellets of 10 mm in diameter and ca. 0.6 mm in thickness. The pellets were cut into several pieces and used for the ac impedance measurement. AC impedance measurements were carried out in a temperature and humidity chamber with a BioLogic VMP3 multichannel potentiostat/galvanostat (Science Instruments) over the frequency range of 2 Hz to 7 MHz and ac amplitude of 500 mV. Copper electrodes were attached on both faces of the pellets. Bulk conductivities were estimated by semicircle fitting of Nyquist plots. Specific heat was measured by applying a thermal relaxation method with a commercial calorimeter (Quantum Design, PPMS) in a temperature range from 200 to 2 K.

**Table S1.** Crystallographic data of CsK-PEG400, Cs-PEG200, and Cs-PEG400

|                                                             | <b>CsK-PEG400</b>                 | <b>Cs-PEG200</b>                          | <b>Cs-PEG400</b>                         |
|-------------------------------------------------------------|-----------------------------------|-------------------------------------------|------------------------------------------|
| Crystal system                                              | hexagonal                         | orthorhombic                              | monoclinic                               |
| Space group                                                 | <i>P</i> 6 <sub>3</sub> 22 (#182) | <i>P</i> <i>m</i> <i>m</i> <i>n</i> (#59) | <i>P</i> 2 <sub>1</sub> / <i>c</i> (#14) |
| Unit cell                                                   | <i>a</i> = 17.2090(3)             | <i>a</i> = 24.1713(15)                    | <i>a</i> = 17.261(5)                     |
|                                                             | <i>c</i> = 28.5570(5)             | <i>b</i> = 16.5887(9)                     | <i>b</i> = 30.571(8)                     |
|                                                             |                                   | <i>c</i> = 12.6541(6)                     | <i>c</i> = 28.331(8)                     |
|                                                             |                                   |                                           | $\beta$ = 105.688(8)                     |
| Volume                                                      | 7324.1(3)                         | 5073.9(3)                                 | 14393(7)                                 |
| <i>Z</i>                                                    | 2                                 | 2                                         | 4                                        |
| <i>D</i> <sub>calc</sub> (g cm <sup>-3</sup> )              | 2.168                             | 3.291                                     | 2.320                                    |
| <i>F</i> (000)                                              | 4087                              | 4266                                      | 8532                                     |
| <i>h, k, l</i> range                                        | -24/25, -19/19,<br>-39/39         | -29/29, -17/20,<br>-15/14                 | -20/20, -36/34,<br>-33/33                |
| $\mu$ (mm <sup>-1</sup> )                                   | 9.286                             | 22.174                                    | 15.633                                   |
| <i>R</i> <sub>1</sub> ( <i>I</i> > 2 $\sigma$ ( <i>I</i> )) | 0.1008                            | 0.0969                                    | 0.1740                                   |
| <i>wR</i> <sub>2</sub> (all data)                           | 0.3674                            | 0.2956                                    | 0.4733                                   |
| GOF on <i>F</i> <sup>2</sup>                                | 1.057                             | 1.049                                     | 1.582                                    |

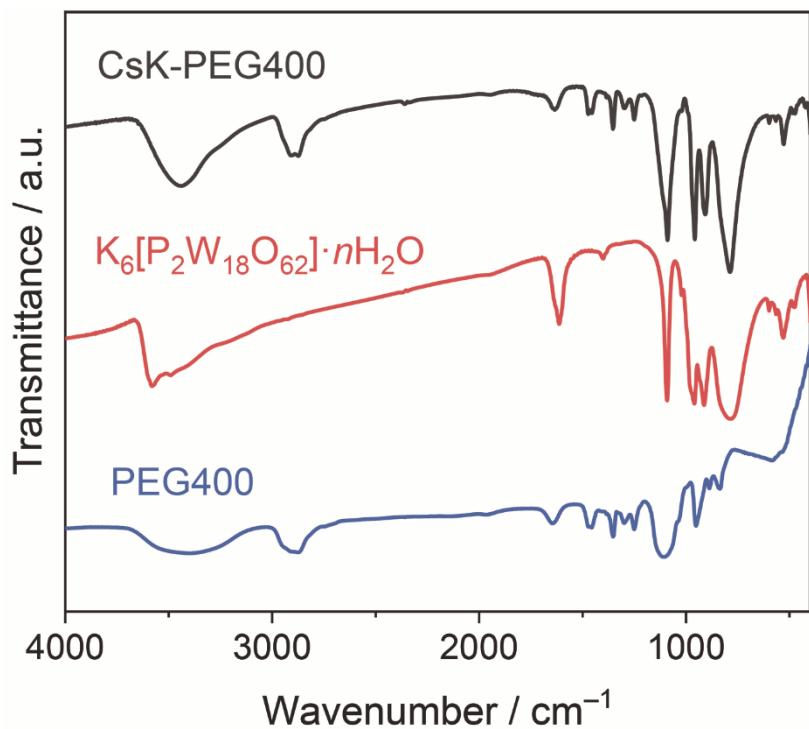

**Fig. S1** IR spectra of **CsK-PEG400** (black),  $K_6[\alpha-P_2W_{18}O_{62}]$  (red) and PEG400 (blue).

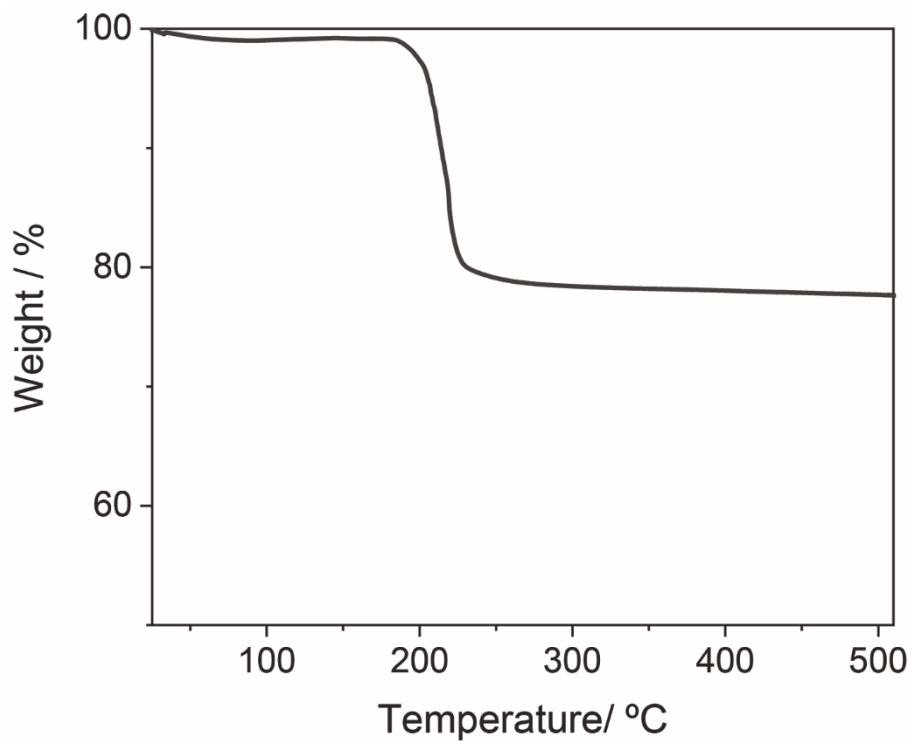

**Fig. S2** TGA curve of **CsK-PEG400**.



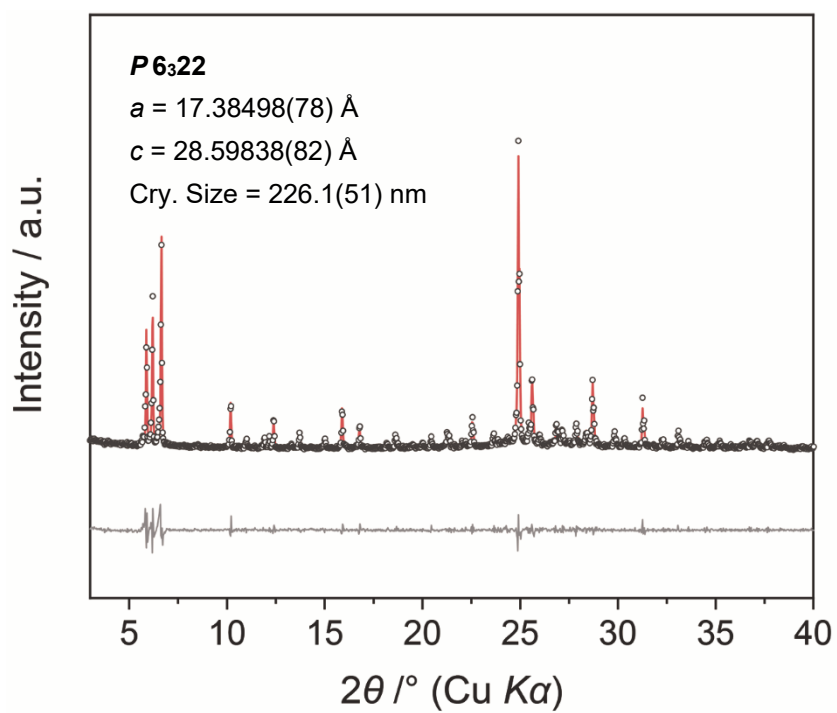

**Fig. S3** Experimental (open circles) and calculated (red solid line) PXR D patterns of **CsK-PEG400**. The bottom line shows the difference profile.

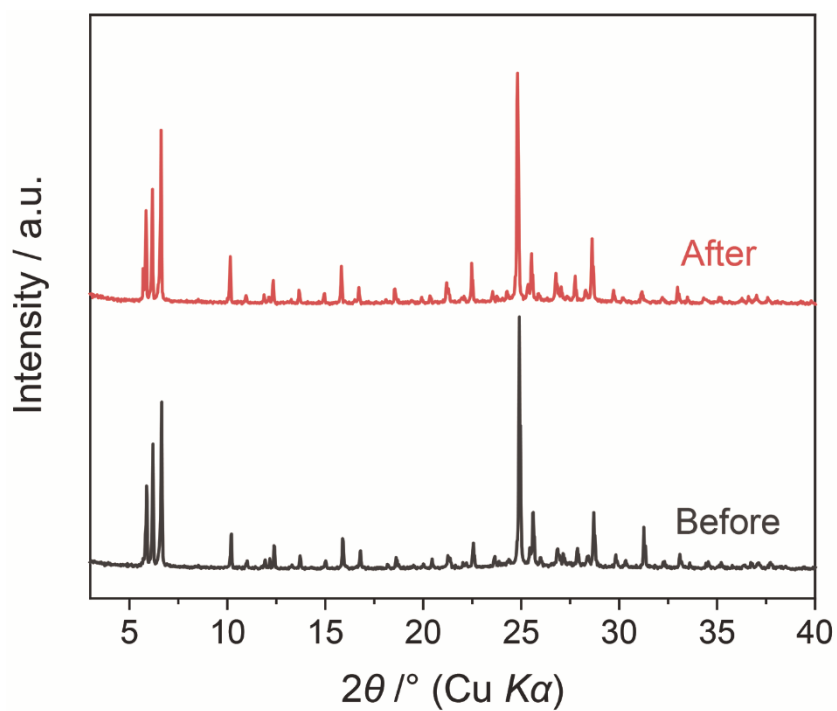

**Fig. S4** PXR D patterns of **CsK-PEG400** before and after heating at 150 °C.

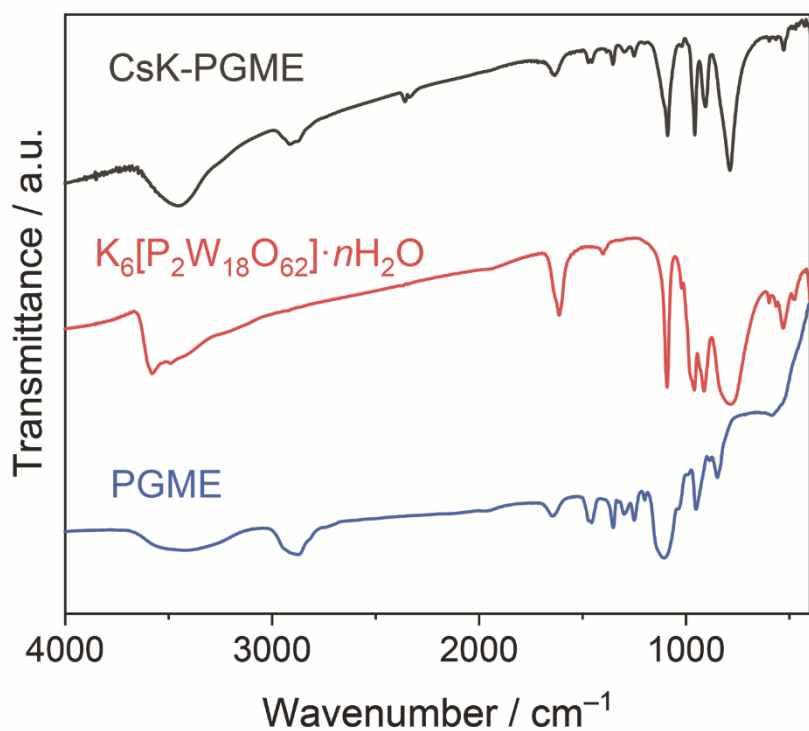

**Fig. S5** IR spectra of CsK-PGME (black), K<sub>6</sub>[ $\alpha$ -P<sub>2</sub>W<sub>18</sub>O<sub>62</sub>] (red), and PGME (blue).

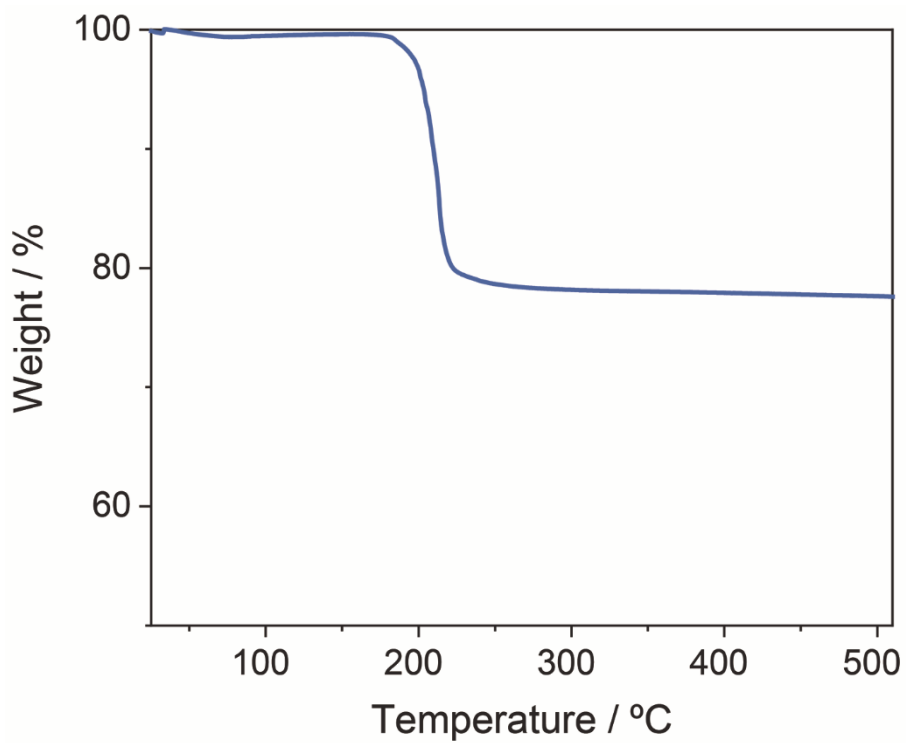

**Fig. S6** TGA curve of CsK-PGME.

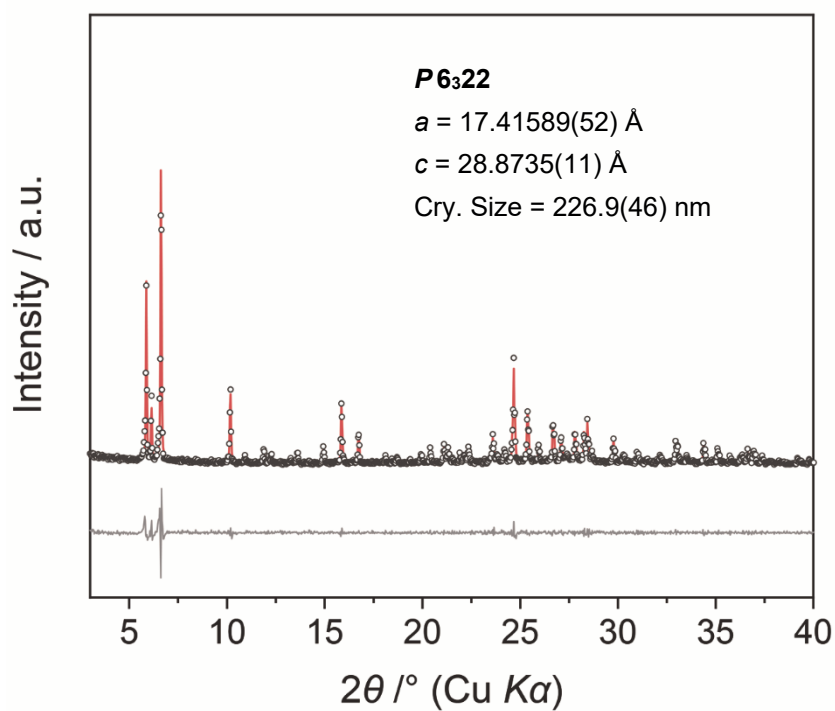

**Fig. S7** Experimental (open circles) and calculated (red solid line) PXR D patterns of CsK-PGME. The bottom line shows the difference profile.

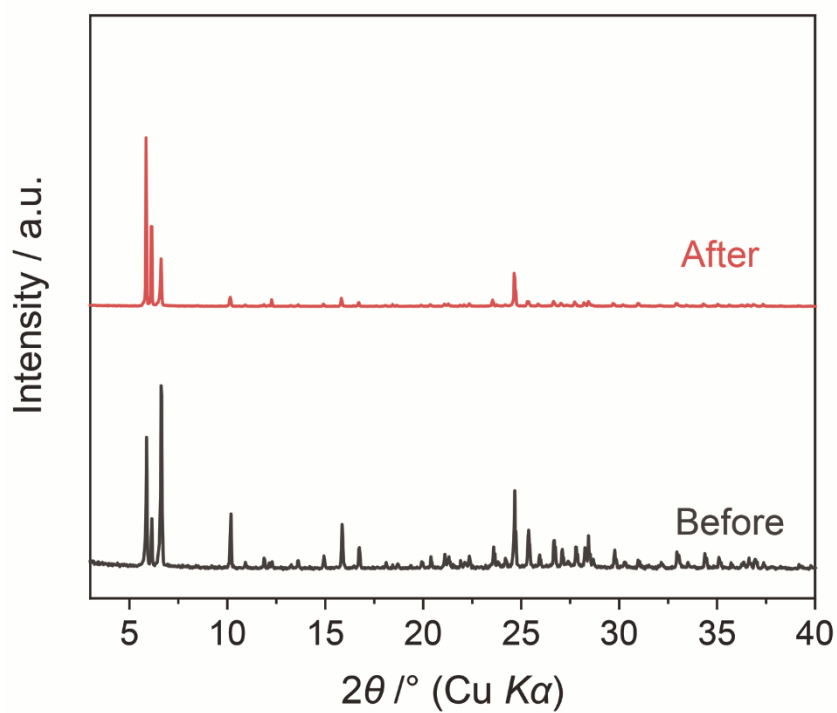

**Fig. S8** PXR D patterns of CsK-PGME before and after heating at 150 °C.

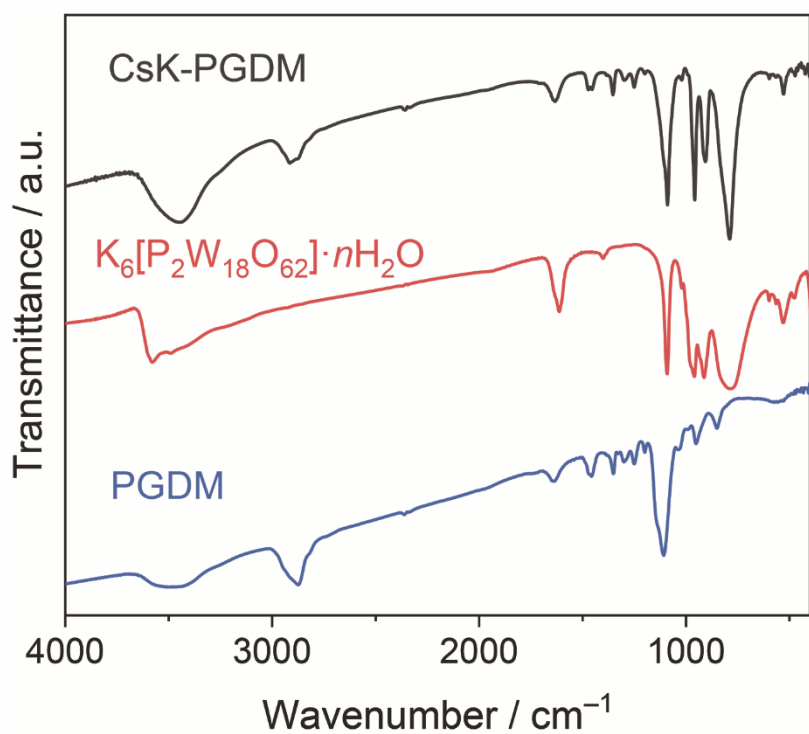

**Fig. S9** IR spectra of **CsK-PGDM** (black),  $K_6[\alpha-P_2W_{18}O_{62}]$  (red), and **PGDM** (blue).

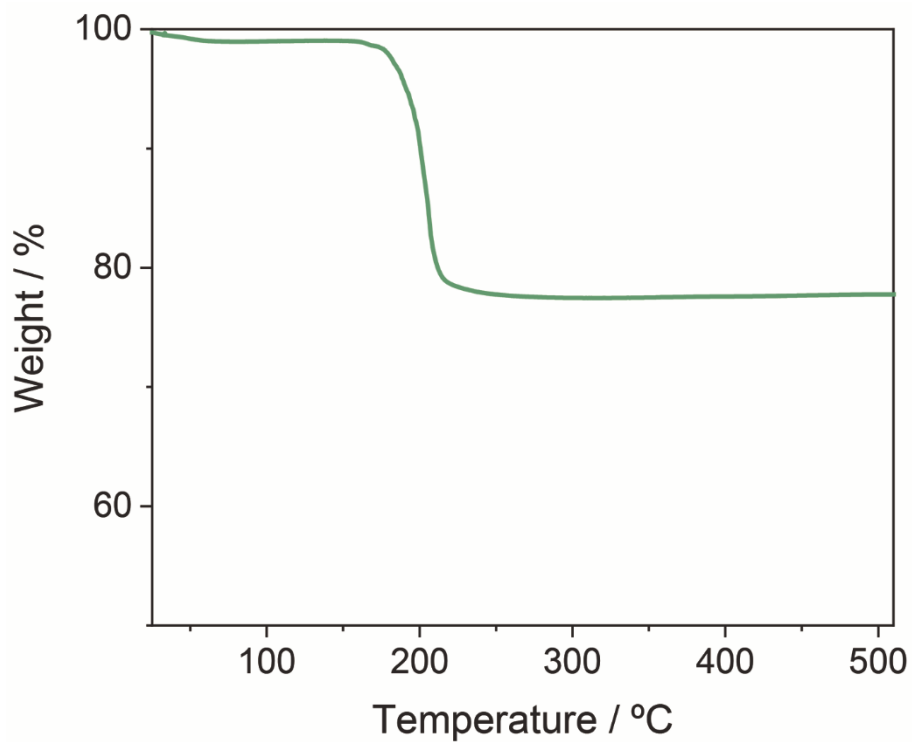

**Fig. S10** TGA curve of **CsK-PGDM**.

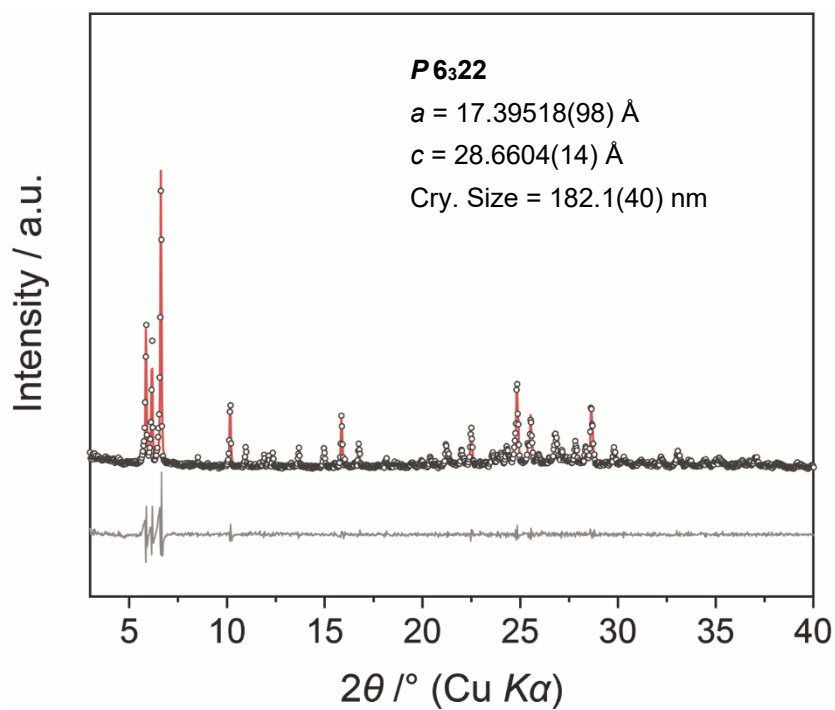

**Fig. S11** Experimental (open circles) and calculated (red solid line) PXR D patterns of CsK-PGDM. The bottom line shows the difference profile.

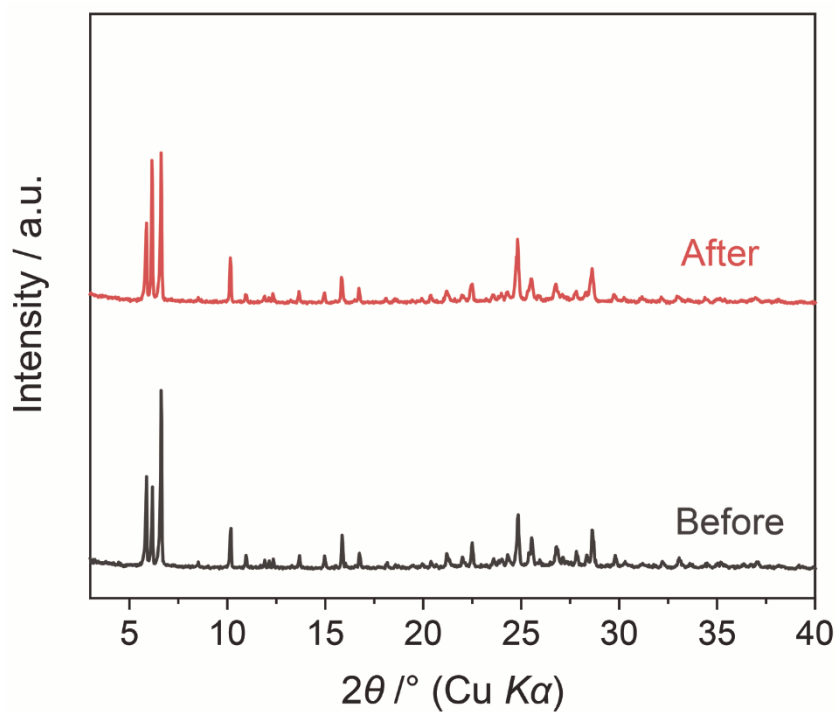

**Fig. S12** PXR D patterns of CsK-PGDM before and after heating at 150 °C.

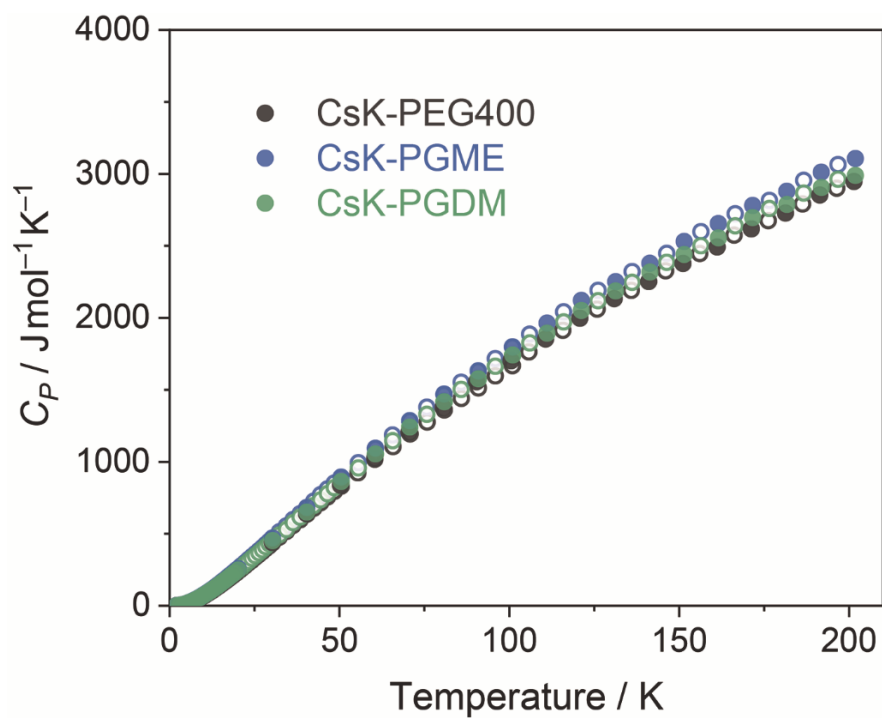

**Fig. S13** Specific heat capacities ( $C_P$ ) of CsK-PEG400, CsK-PGME, and CsK-PGDM.

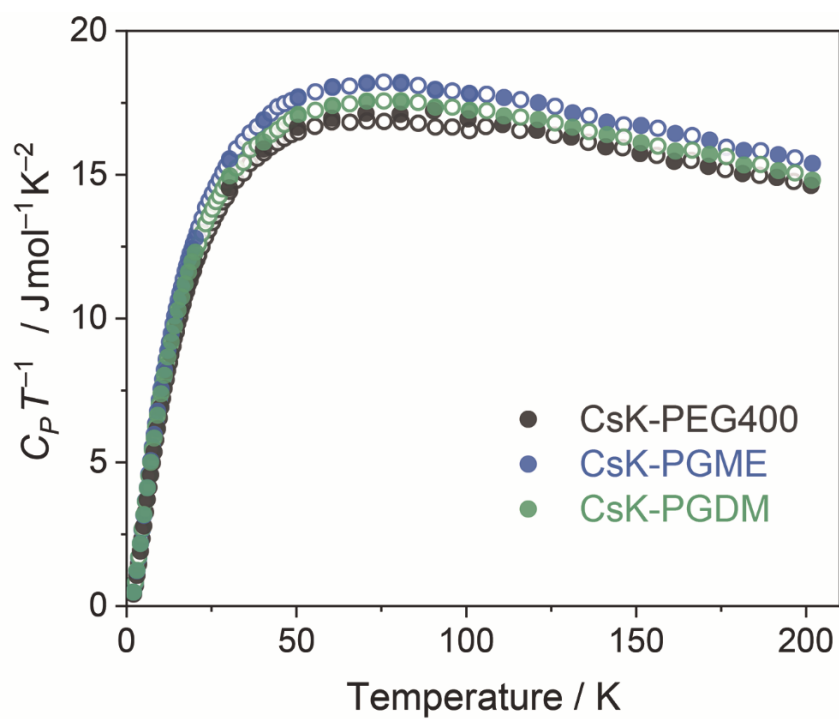

**Fig. S14**  $C_P T^{-1}$  of CsK-PEG400, CsK-PGME and CsK-PGDM.

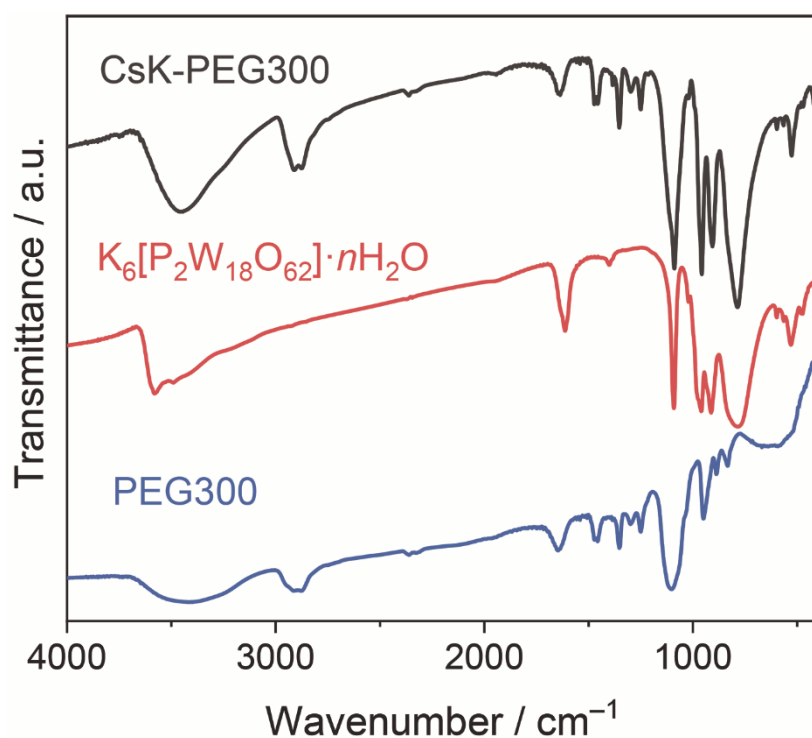

**Fig. S15** IR spectra of CsK-PEG300 (black), K<sub>6</sub>[α-P<sub>2</sub>W<sub>18</sub>O<sub>62</sub>] (red), and PEG300 (blue).

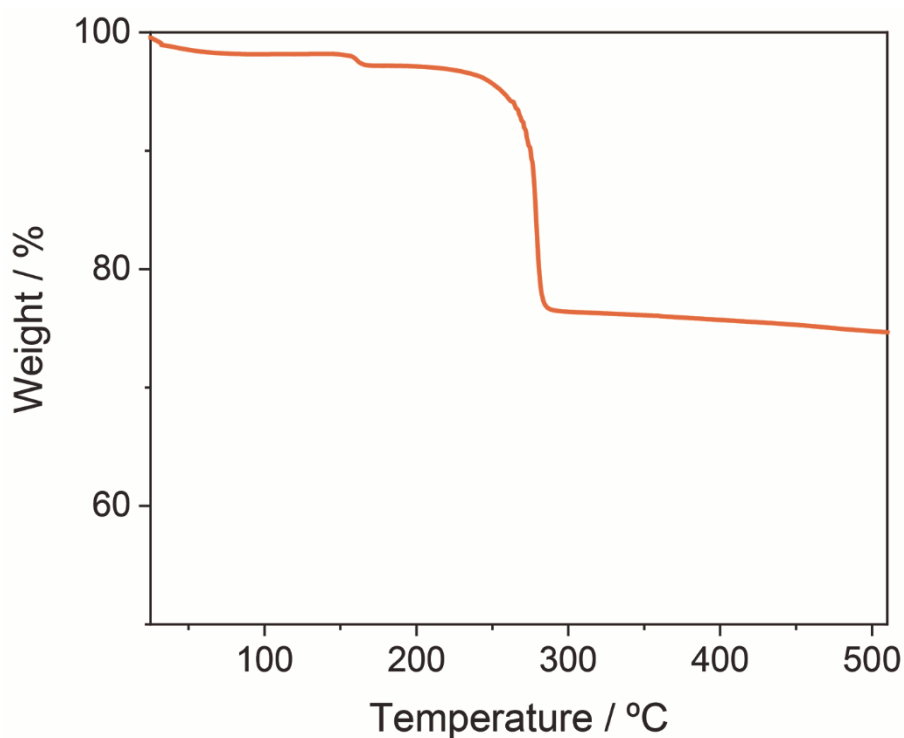

**Fig. S16** TGA curve of CsK-PEG300.

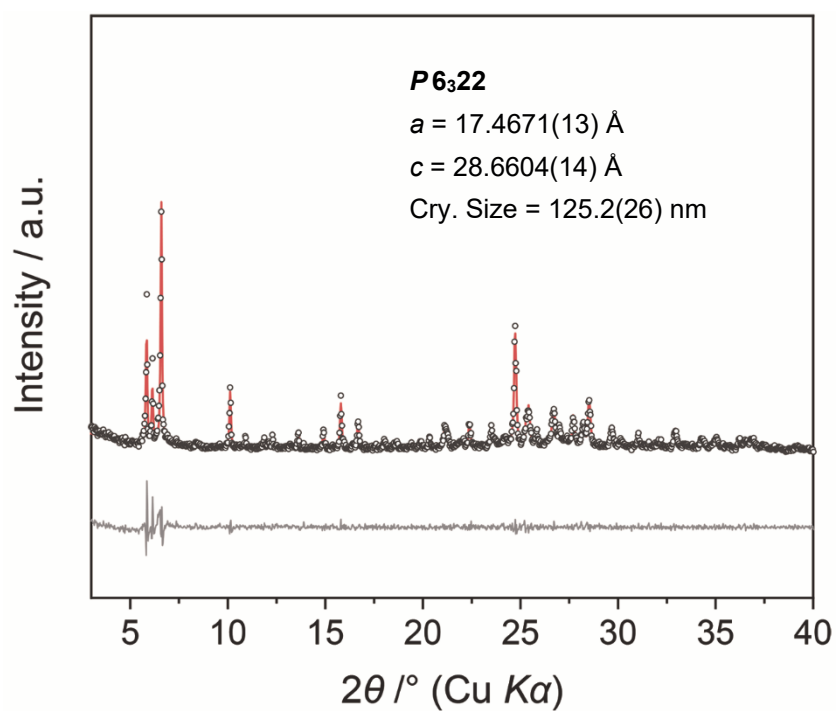

**Fig. S17** Experimental (open circles) and calculated (red solid lines) PXRd patterns of CsK-PEG300. The bottom line show the difference profile.

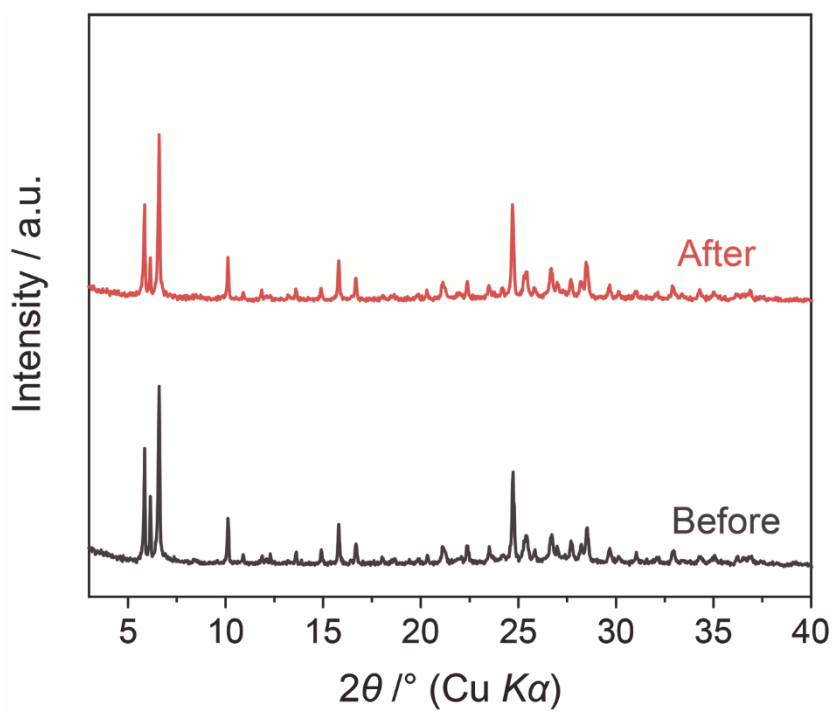

**Fig. S18** PXRd patterns of CsK-PEG300 before and after heating at 150 °C.



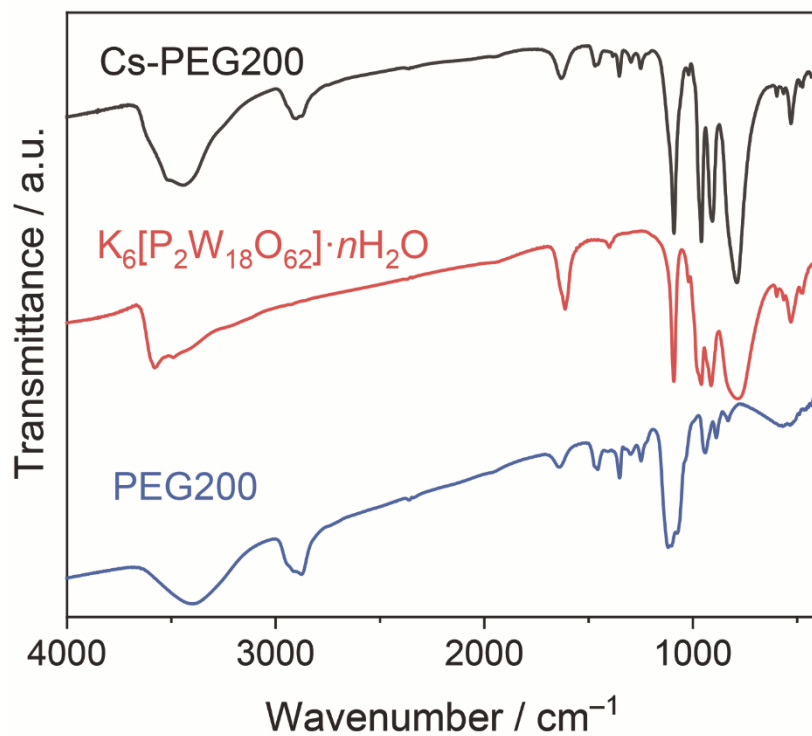

**Fig. S19** IR spectra of Cs-PEG200 (black), K<sub>6</sub>[α-P<sub>2</sub>W<sub>18</sub>O<sub>62</sub>] (red), and PEG200 (blue).

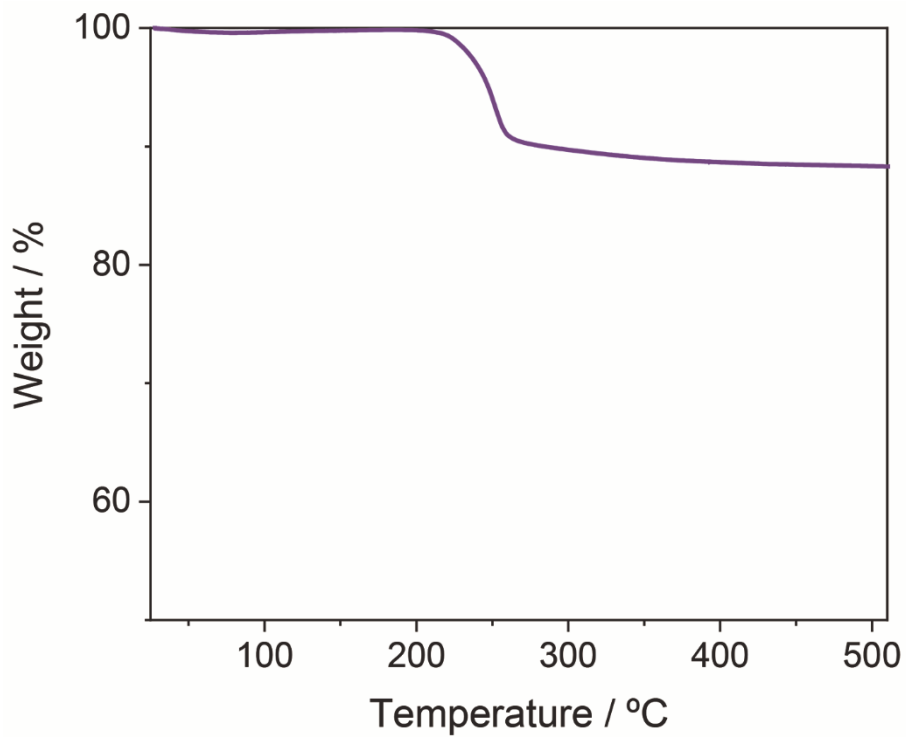

**Fig. S20** TGA curve of Cs-PEG200.

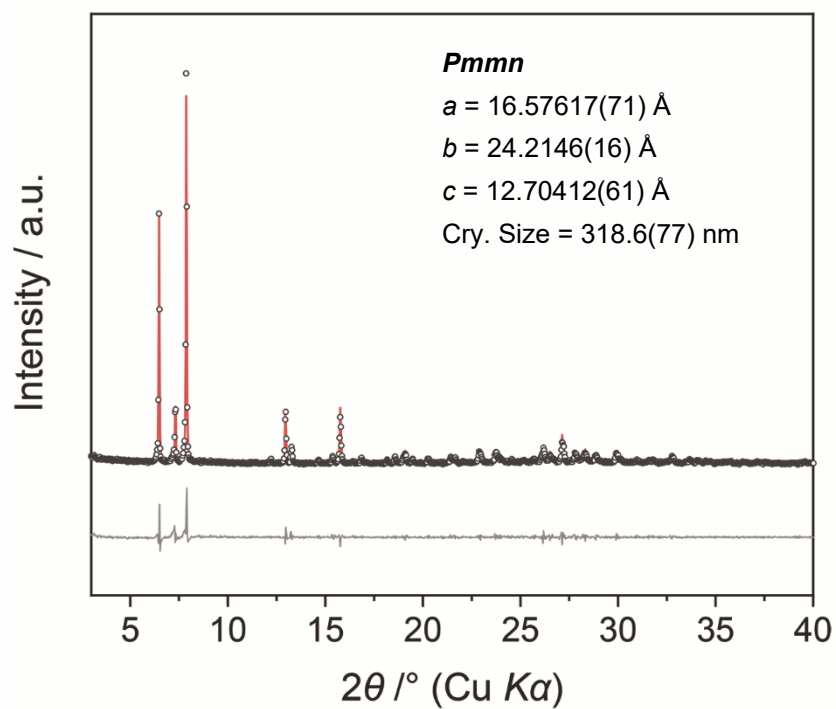

**Fig. S21** Experimental (open circles) and calculated (red solid lines) PXR D patterns of Cs-PEG200. The bottom line shows the difference profile.

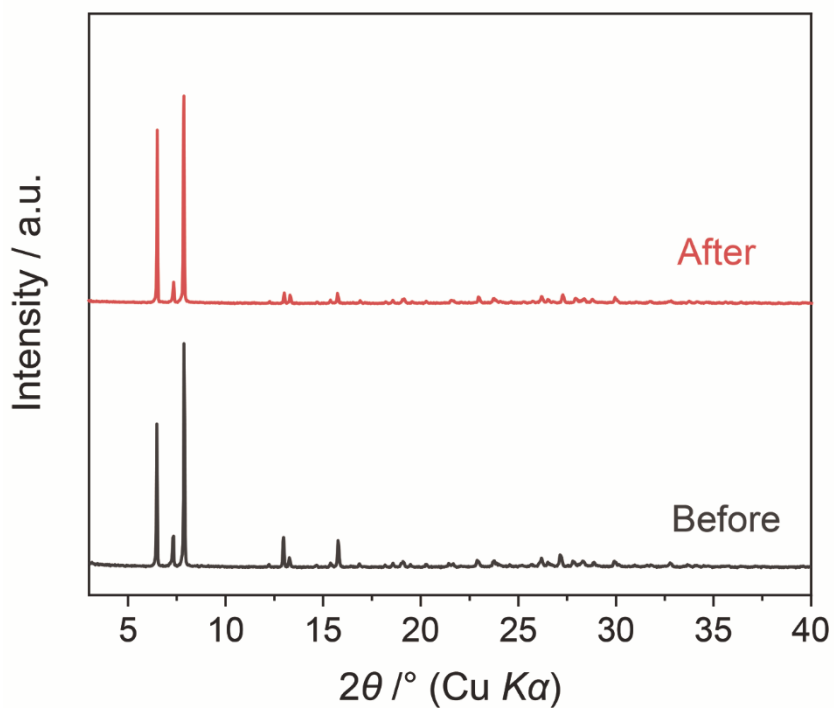

**Fig. S22** PXR D patterns of Cs-PEG200 before and after heating at 150 °C.

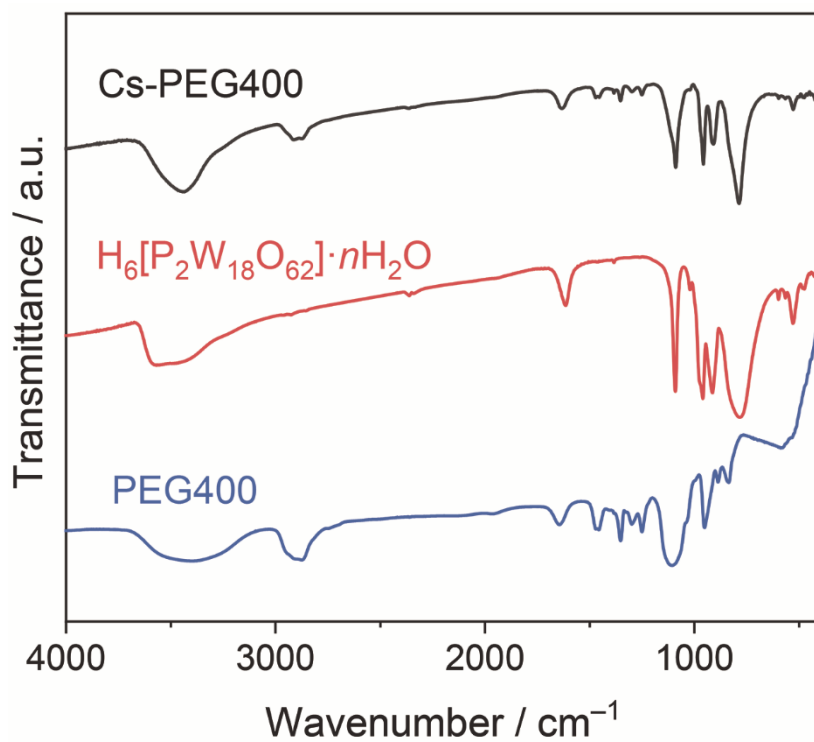

**Fig. S23** IR spectra of Cs-PEG400 (black), H<sub>6</sub>[ $\alpha$ -P<sub>2</sub>W<sub>18</sub>O<sub>62</sub>] (red), and PEG400 (blue).

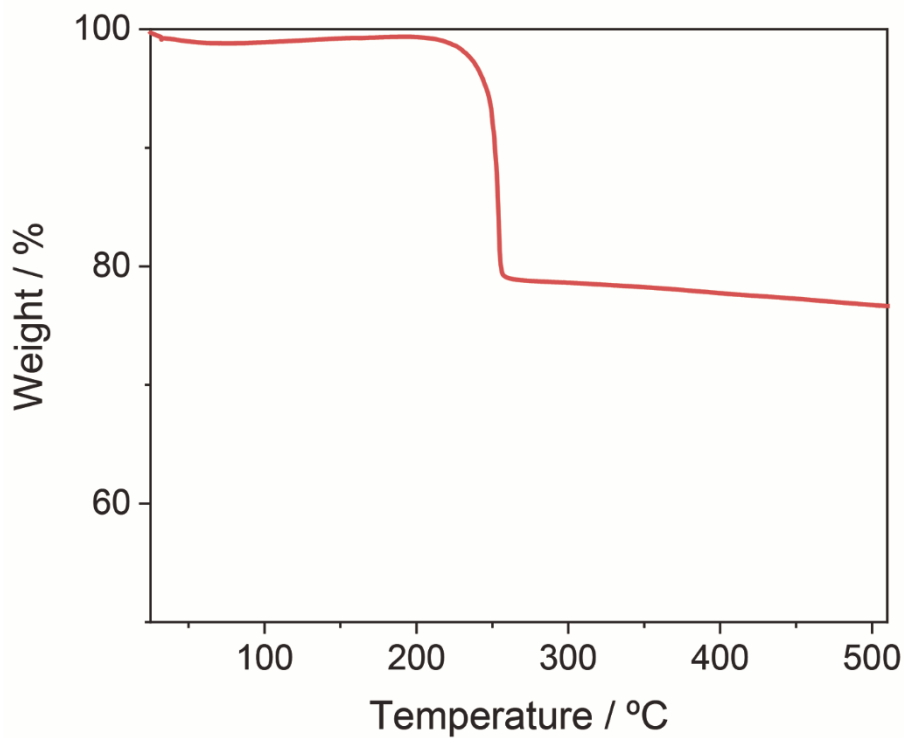

**Fig. S24** TGA curve of Cs-PEG400.

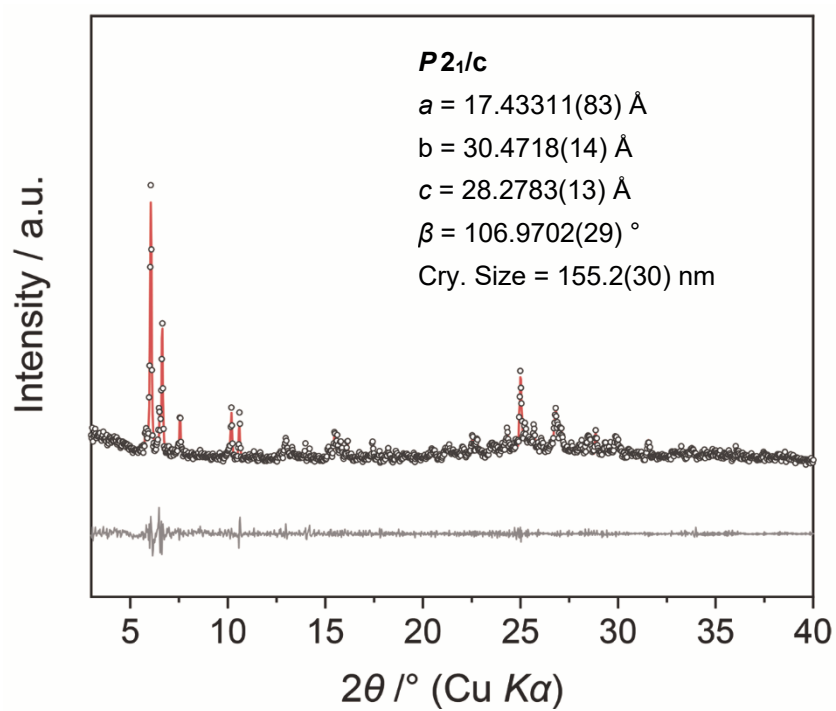

**Fig. S25** Experimental (open circles) and calculated (red solid lines) PXR D patterns of Cs-PEG400. The bottom line shows the difference profile.

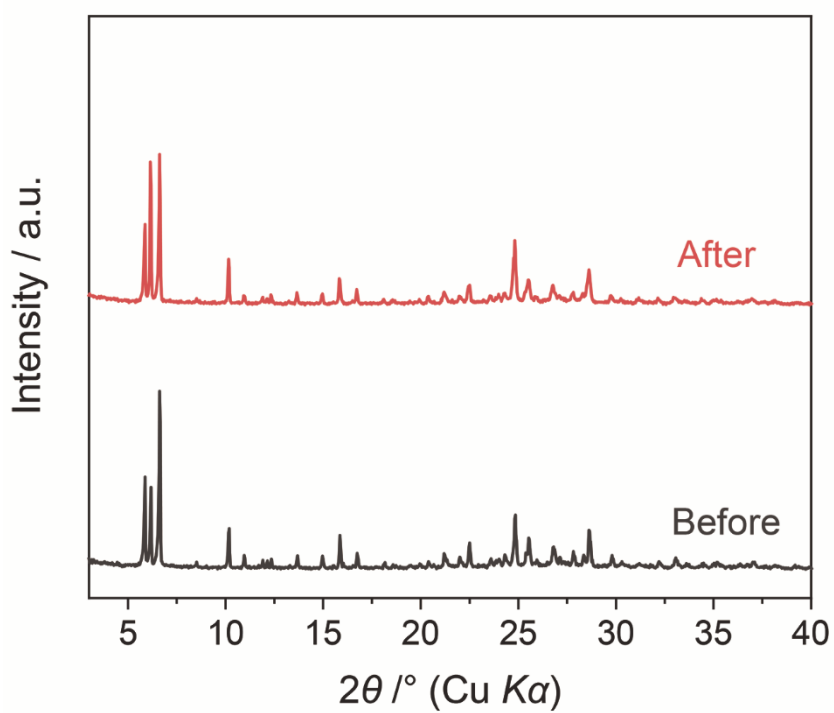

**Fig. S26** PXR D patterns of Cs-PEG400 before and after heating at 150 °C.

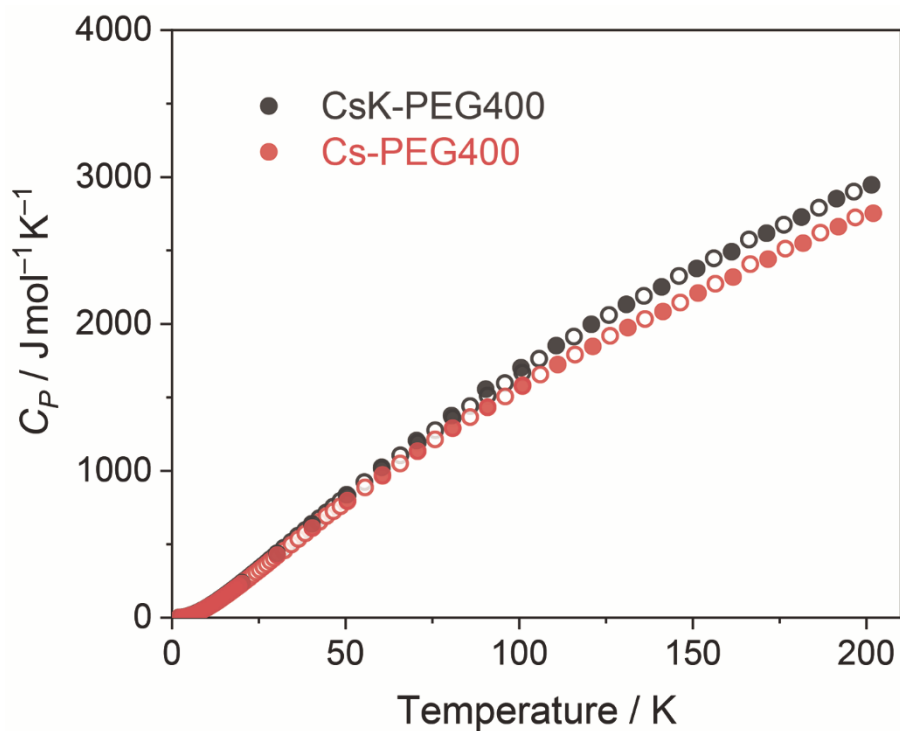

Fig. S27 Specific heat capacities ( $C_P$ ) of CsK-PEG400 and Cs-PEG400.

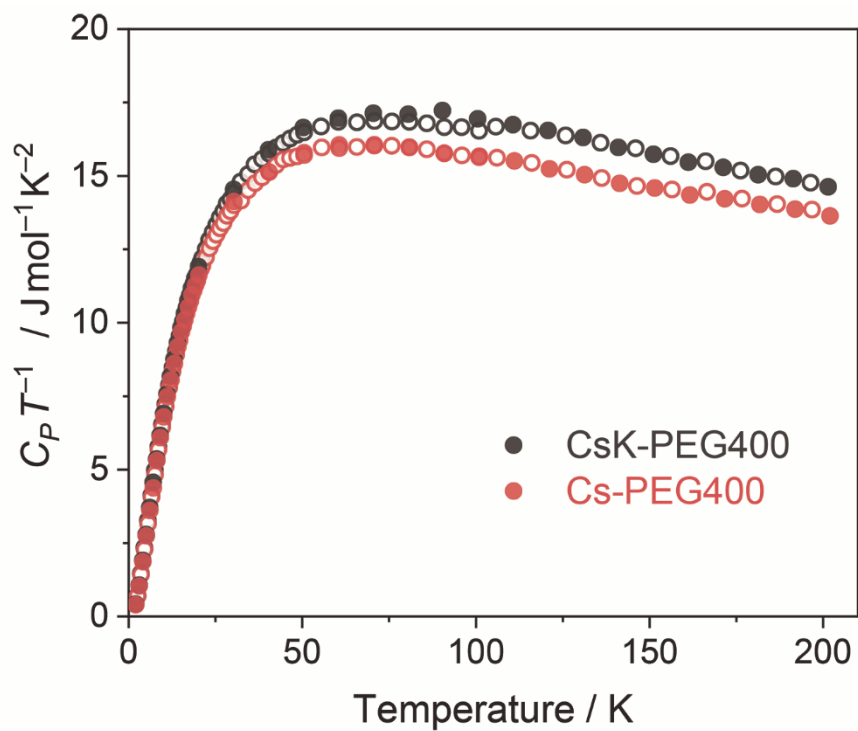

Fig. S28  $C_P T^{-1}$  of CsK-PEG400 and Cs-PEG400.

## References

1. (a) C. R. Graham and R. G. Finke, *Inorg. Chem.*, 2008, **47**, 3679–3686; (b) G. Baronetti, L. Briand, U. Sedran and H. Thomas, *Appl. Catal. A*, 1998, **172**, 265–272.
2. W. Minor, M. Cymborowski, Z. Otwinowski and M. Chruszcz, *Acta Cryst.*, 2006, **D62**, 859–866.
3. *CrystalStructure*, ver. 4.3; Rigaku Corporation, Tokyo, Japan, 2019.
4. *CrysAlis PRO*, Rigaku Oxford Diffraction, Tokyo, Japan, 2015.
